# Supplementary figures and images for: Crystal growth and spontaneous polarization mechanism of polar metal borate halides: Mn3B7O13Cl
Source: Royal Society of Chemistry journal article supplement (doi:10.1039/d4ce00060a), 2024-01-01

**1333K**

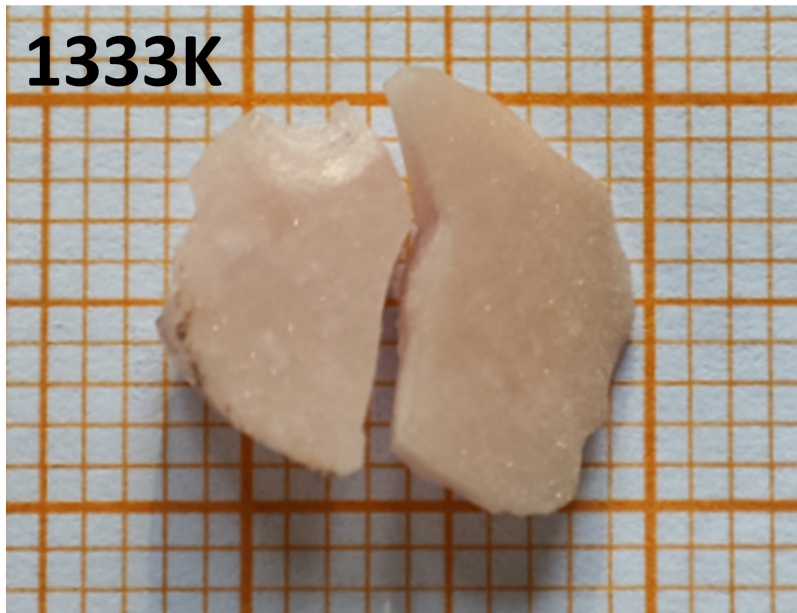

**1343K**

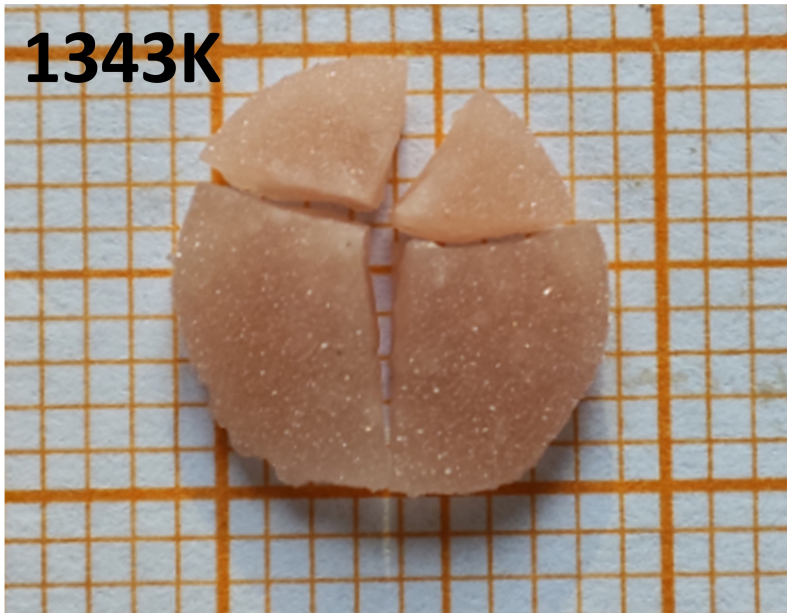

**1353K**

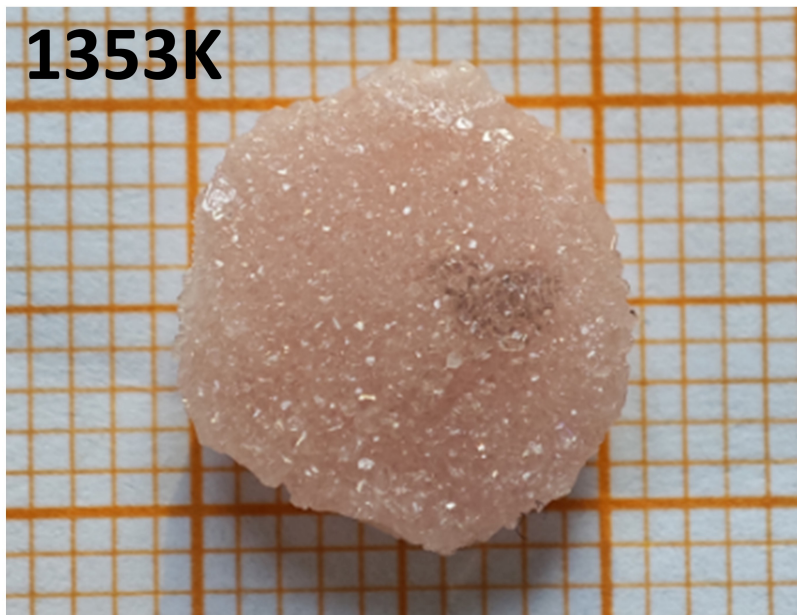

**1363K**

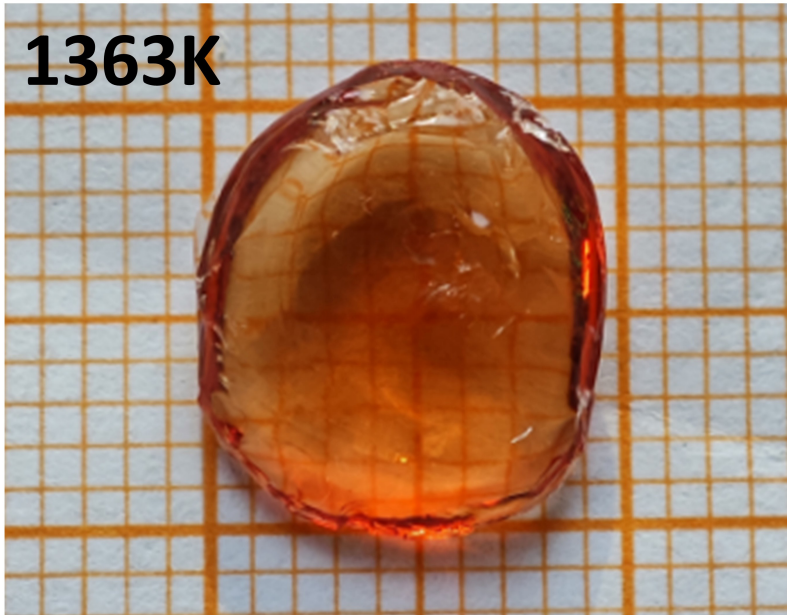

Supplement: d4ce00060a6.pdf [file d4ce00060a6.pdf]

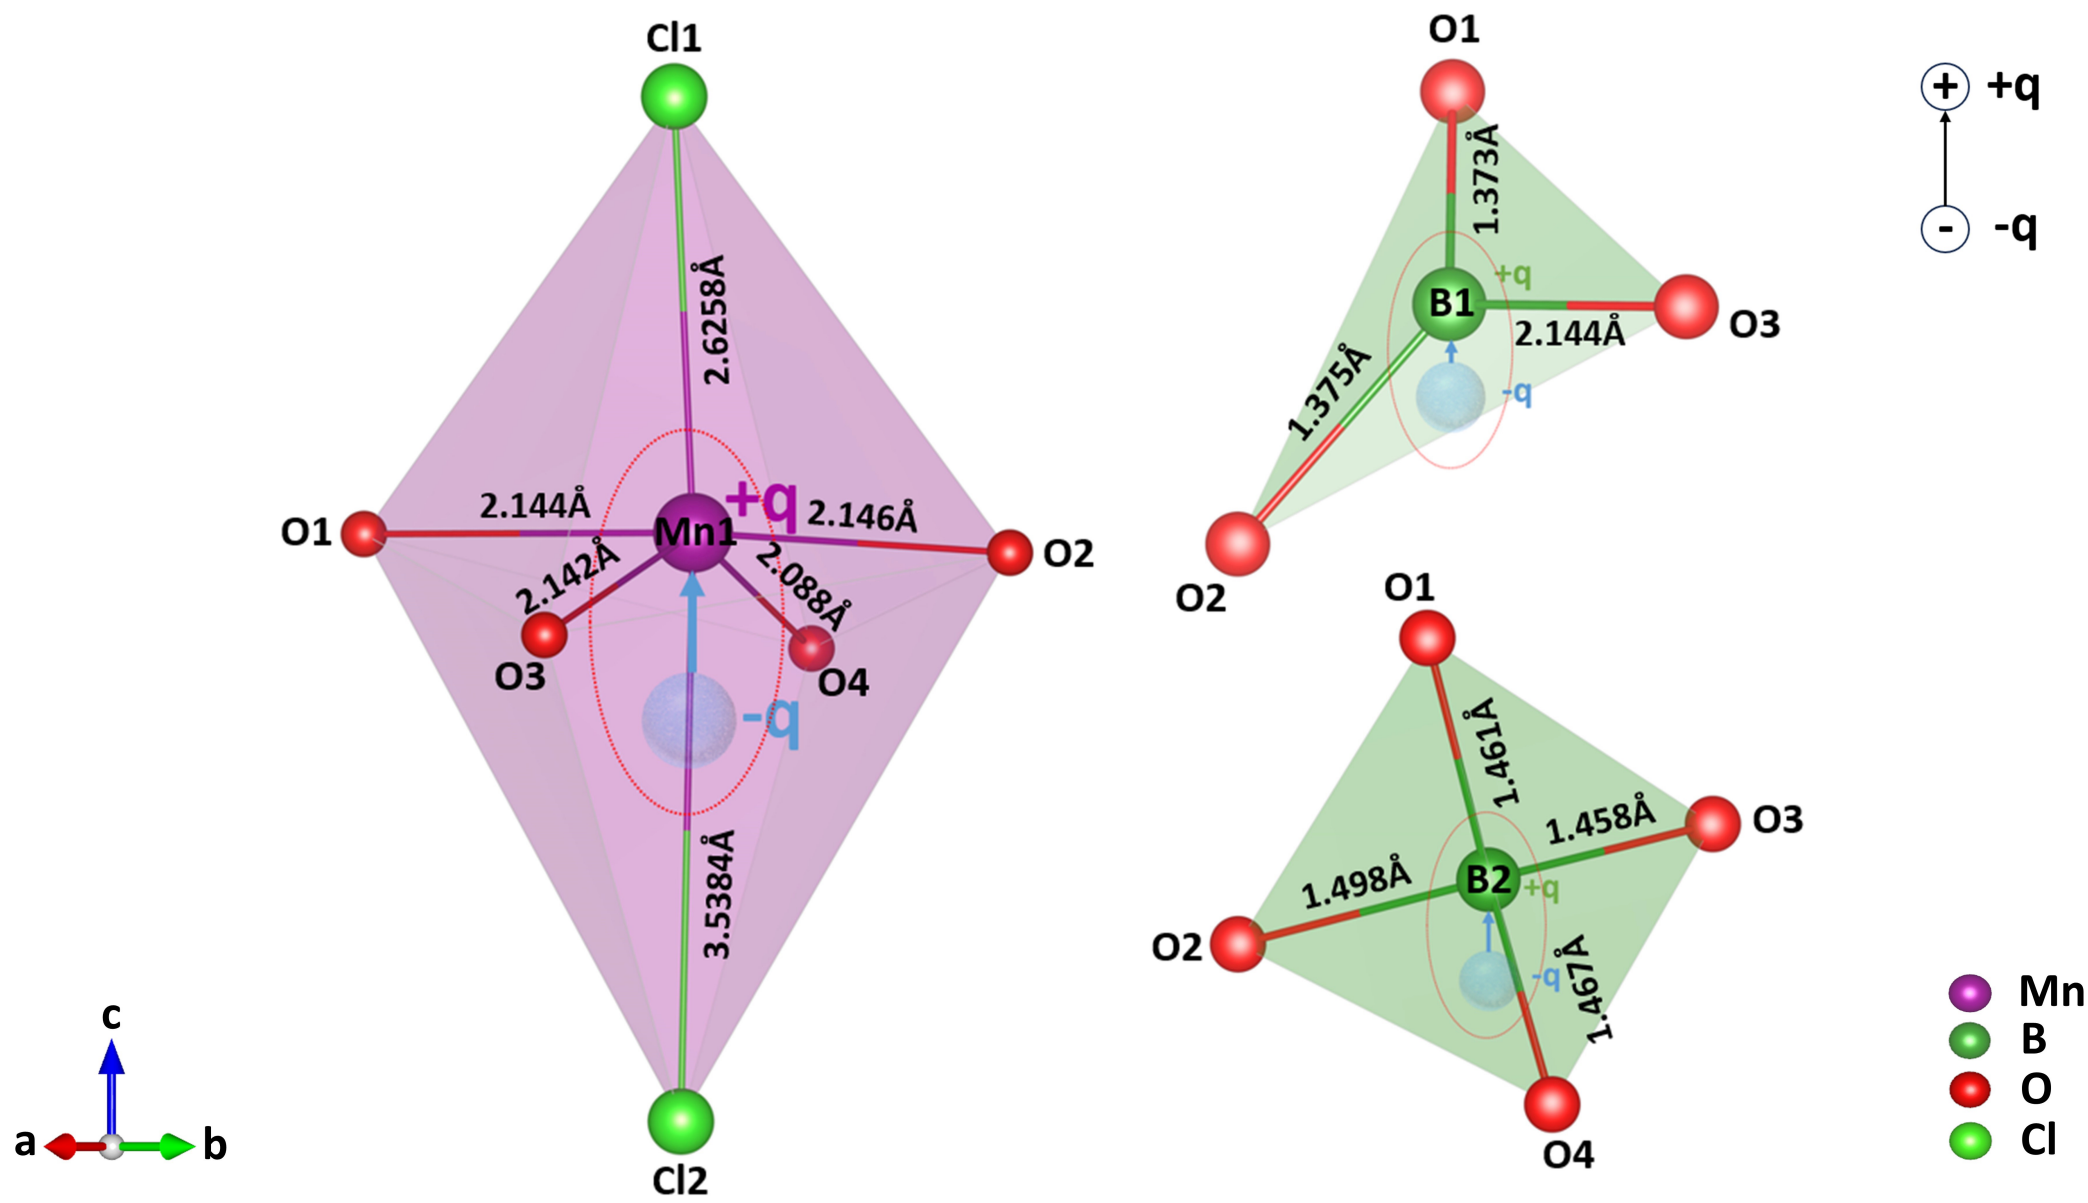

Supplement: d4ce00060a8.pdf [file d4ce00060a8.pdf]
